# Supplementary material for: Vacancy-induced anion and cation redox chemistry in cation-deficient F-doped anatase TiO2
Source: Royal Society of Chemistry journal article supplement (doi:10.1039/d0ta07578g), 2020-01-01
Supplement: d0ta07578g1.pdf [file d0ta07578g1.pdf]

## **Supporting Information**

### **Vacancy-Induced Anion and Cation Redox Chemistry in Cation-Defect F-doped Anatase TiO<sub>2</sub>**

Haoxin Li<sup>ab</sup>, Yining Li<sup>bc</sup>, Xiaolin Zhao<sup>bc</sup>, Youwei Wang<sup>bc</sup>, Kexian Huang<sup>b</sup>, Wujie Qiu<sup>\*bc</sup>, Jifen Wang<sup>\*a</sup> and Jianjun Liu<sup>\*bcd</sup>

<sup>a</sup>School of Science, College of Art and Science, Shanghai Polytechnic University No. 2360 Jinhai Rd., Shanghai 201209, China

<sup>b</sup>State Key Laboratory of High Performance Ceramics and Superfine Microstructure, Shanghai Institute of Ceramics, Chinese Academy of Sciences, 1295 Dingxi Road, Shanghai 200050, China

<sup>c</sup>Center of Materials Science and Optoelectronics Engineering, University of Chinese Academy of Sciences, Beijing 100049, China

<sup>d</sup>School of Chemistry and Materials Science, Hangzhou Institute for Advanced Study, University of Chinese Academy of Science, 1 Sub-lane Xiangshan, Hangzhou, 310024, China

\*Email: [jliu@mail.sic.ac.cn](mailto:jliu@mail.sic.ac.cn); [wjqiu1988@gmail.com](mailto:wjqiu1988@gmail.com); [wangjifen@sspu.edu.cn](mailto:wangjifen@sspu.edu.cn)

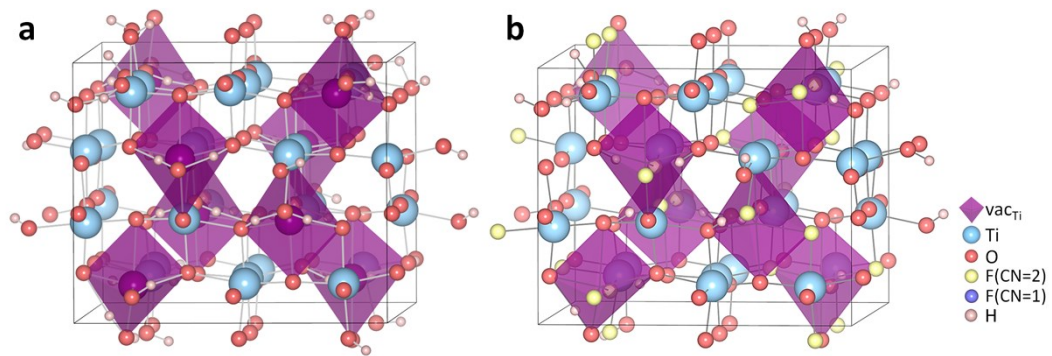

**Fig. S1 (a) The structure of  $\text{Ti}_{0.78}\square_{0.22}\text{O}_{1.11}(\text{OH})_{0.89}$ . (b) structure of  $\text{Ti}_{0.78}\square_{0.22}\text{O}_{1.11}\text{F}_{0.44}(\text{OH})_{0.44}$ .**

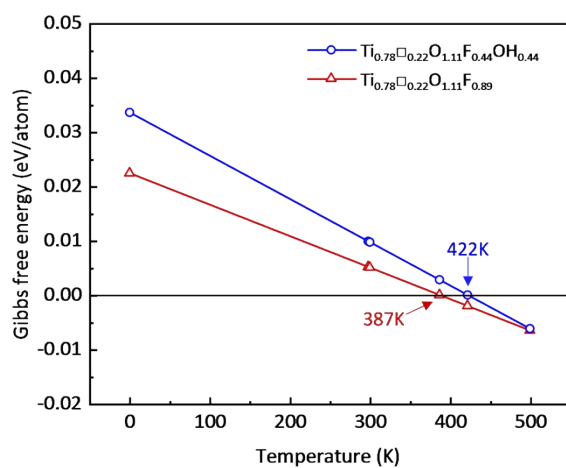

**Fig. S2** Calculated temperature-dependent free energy of  $\text{Ti}_{0.78}\text{O}_{1.11}\text{F}_{0.89}$  (red line) and  $\text{Ti}_{0.78}\text{O}_{1.11}\text{F}_{0.44}(\text{OH})_{0.44}$  (blue line) versus  $\text{TiO}_2$ ,  $\text{TiF}_4$  and  $\text{H}_2\text{O}$  phase mixtures.

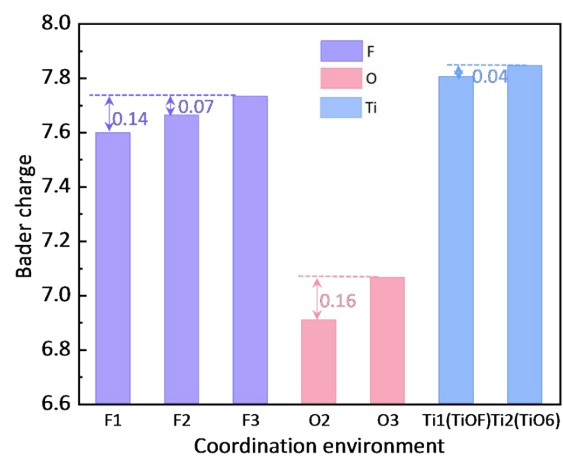

**Fig. S3 Bader charge analysis of different local structures. F with three coordination positions, O with two coordination positions as and Ti with two regions.**

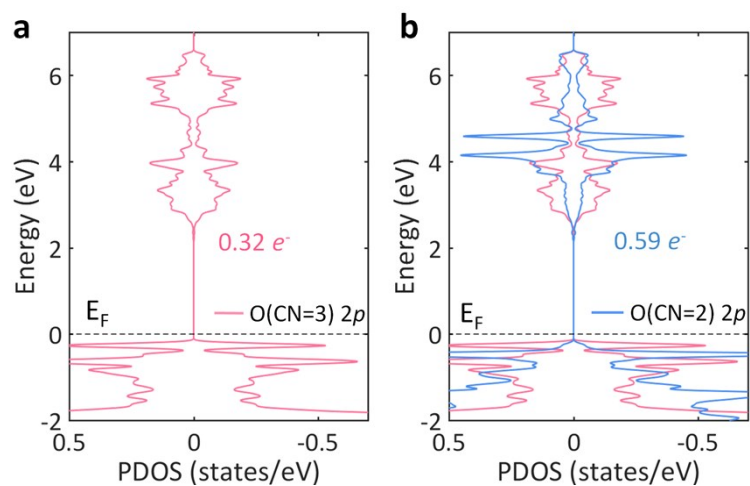

**Fig. S4 Effects of different coordination environments on the electronic state of oxygen anions. The projected density of the O-2p orbital state density (pDOS) of O atoms in oxygen-doped defect titanium dioxide consists of different coordination (a) three coordination (b) two coordination.**

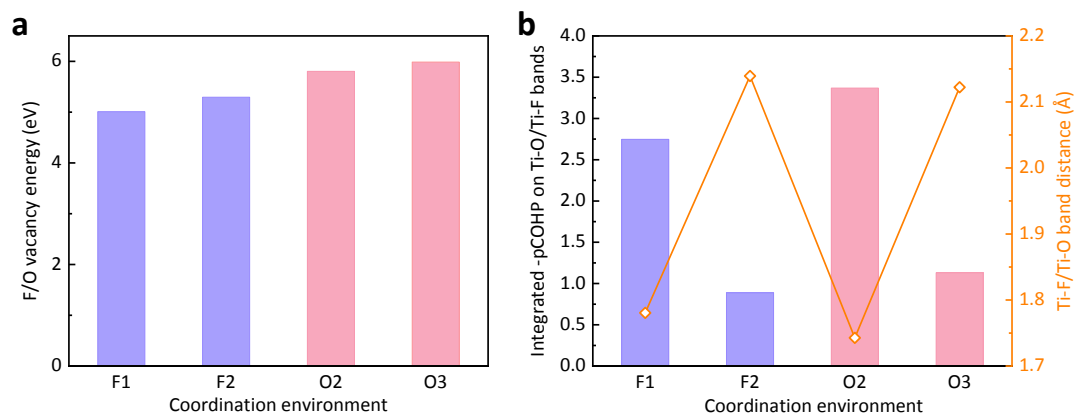

**Fig. S5 Stability of oxidation state F and O. (a) The vacancy formation energy of oxygen or fluorine atoms. (b) The integration of the projection crystal orbital Hamiltonian population (ICOHP) shows Ti-O/Ti-F bond strength.**

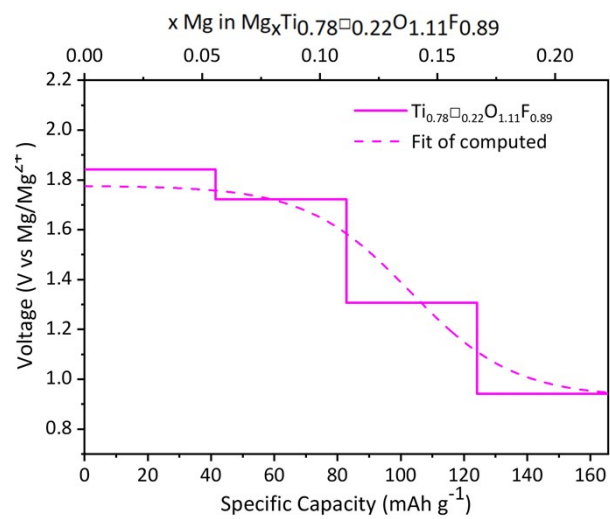

**Fig. S6** Calculated voltage plateaus of Mg<sup>2+</sup> insertion and the fitting voltage curve.

**Table S1. The calculation details of the chemical potential in the solid-phase method.**

**Experimental values, calculated values and equations of TiO<sub>2</sub>, TiF<sub>3</sub> and Ti.**

| Compounds        | $E_{\text{DFT}}(\text{GGA})$                                                                                                           | $\Delta G_r(\text{Expt})$ (kJ/mol) |
|------------------|----------------------------------------------------------------------------------------------------------------------------------------|------------------------------------|
| TiO <sub>2</sub> | -26.90                                                                                                                                 | -833.266                           |
| TiF <sub>3</sub> | -27.09                                                                                                                                 | -1361.864                          |
| Ti               | -7.85                                                                                                                                  | 0                                  |
| Equation(I)      | $\mu_{\text{O}_2} = E^{\text{TiO}_2}(\text{GGA}) - E^{\text{Ti}}(\text{GGA}) - \Delta G_r^{\text{O}}(\text{Expt})$ (eV)                |                                    |
| Equation(II)     | $\mu_{\text{F}_2} = \frac{3}{2}\{E^{\text{TiF}_3}(\text{GGA}) - E^{\text{Ti}}(\text{GGA}) - \Delta G_r^{\text{F}}(\text{Expt})\}$ (eV) |                                    |



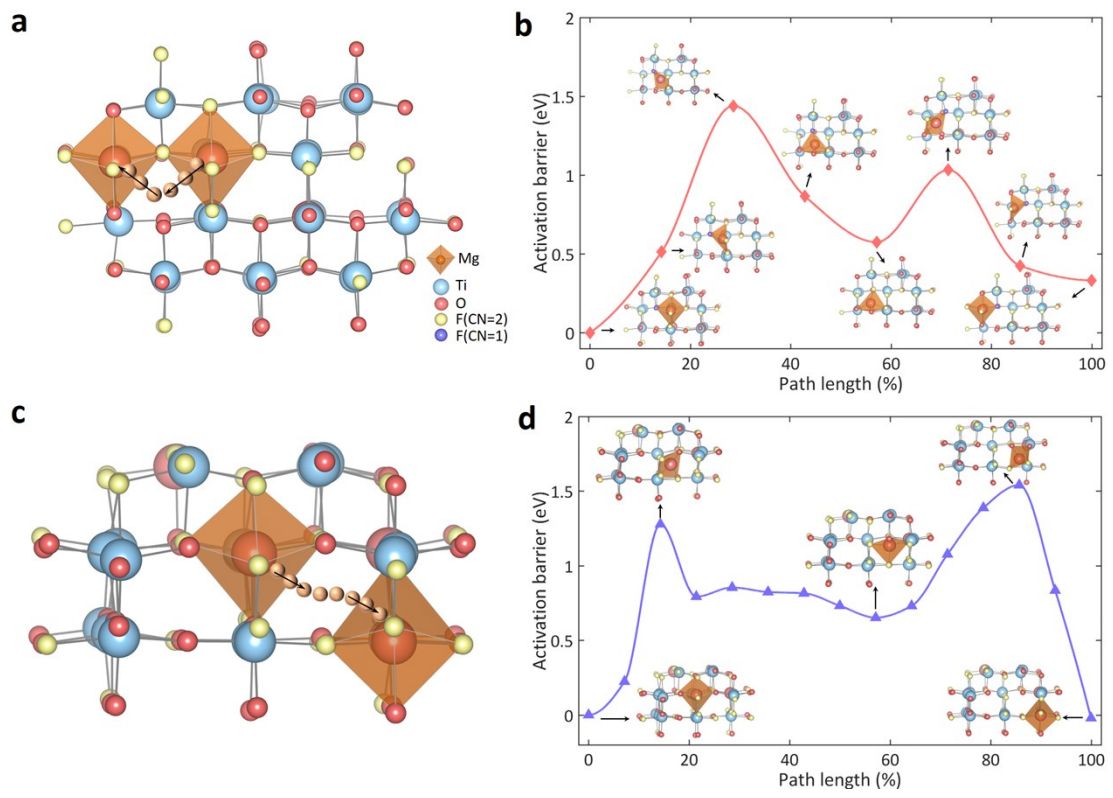

**Fig. S7** The a and b are the Mg migration paths in scattered-defect structures, c and d are Mg migration paths in connected-defect structures.

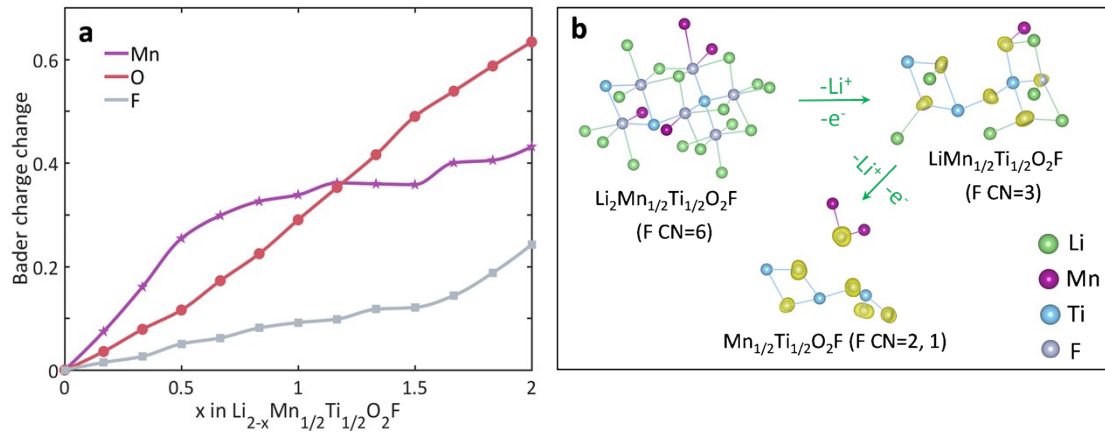

**Fig. S8 Electrochemical characteristics of  $\text{Li}_2\text{Ti}_{0.5}\text{Mn}_{0.5}\text{O}_2\text{F}$ . (a) Average change of bader charge during delithiation. (b) The evolution of F coordination number in the process of delithiation.**
